# Supplementary material for: On the enthalpic preference of fragment binding
Source: Royal Society of Chemistry journal article supplement (doi:10.1039/c5md00542f), 2015-12-10
Supplement: c5md00542f1.xlsx [file c5md00542f1.xlsx]

## Sheet: __JChemStructureSheet
Hash	StructureStringLength	StructureStringFormat	StructureString
20766738B49C15E056F03E15B19CD5B2	1	cxsmiles	JChemExcelNQAAAB+LCAAAAAAABADtvQdgHEmWJSYvbcp7f0r1StfgdKEIgGATJNiQQBDswYjN5pLsHWlHIymrKoHKZVZlXWYWQMztnbz33nvvvffee++997o7nU4n99//P1xmZAFs9s5K2smeIYCqyB8/fnwfPyKmu1tf3pnuTbeq6db29N50ij+3vvfl9vfvTKf37K97n9HH5o/d/wdGlJFsNQAAAA==
816B7E46EEFDF9F9B9806D187D7ADC82	1	cxsmiles	JChemExcelDgAAAB+LCAAAAAAABADtvQdgHEmWJSYvbcp7f0r1StfgdKEIgGATJNiQQBDswYjN5pLsHWlHIymrKoHKZVZlXWYWQMztnbz33nvvvffee++997o7nU4n99//P1xmZAFs9s5K2smeIYCqyB8/fnwfPyJenGx99uLOdHeKZ/f/ATjisnQOAAAA
64A4B4966334B0BBE7C283E45A0E2F97	1	cxsmiles	JChemExcelEwAAAB+LCAAAAAAABADtvQdgHEmWJSYvbcp7f0r1StfgdKEIgGATJNiQQBDswYjN5pLsHWlHIymrKoHKZVZlXWYWQMztnbz33nvvvffee++997o7nU4n99//P1xmZAFs9s5K2smeIYCqyB8/fnwfPyK+PNn67Ms7093pdG+KZ6/a/X8AwK+vjxMAAAA=
6AA038C5FA8E9732861AF26133EA933D	1	cxsmiles	JChemExcelEwAAAB+LCAAAAAAABADtvQdgHEmWJSYvbcp7f0r1StfgdKEIgGATJNiQQBDswYjN5pLsHWlHIymrKoHKZVZlXWYWQMztnbz33nvvvffee++997o7nU4n99//P1xmZAFs9s5K2smeIYCqyB8/fnwfPyK+PNn67Ms7091qOd2b4tnd+38APXWhXBMAAAA=
EF2E935A0CAD287B53D6704D9120382C	1	cxsmiles	JChemExcelNQAAAB+LCAAAAAAABADtvQdgHEmWJSYvbcp7f0r1StfgdKEIgGATJNiQQBDswYjN5pLsHWlHIymrKoHKZVZlXWYWQMztnbz33nvvvffee++997o7nU4n99//P1xmZAFs9s5K2smeIYCqyB8/fnwfPyJOtk62Xm5978vt79+Rfz/78g59gH/5T/7nyzsn33vx7U++v3WC587J/wN6Ca4jNQAAAA==
78D73157BC2C7FD1E658A2247C6A728B	1	cxsmiles	JChemExcelMAAAAB+LCAAAAAAABADtvQdgHEmWJSYvbcp7f0r1StfgdKEIgGATJNiQQBDswYjN5pLsHWlHIymrKoHKZVZlXWYWQMztnbz33nvvvffee++997o7nU4n99//P1xmZAFs9s5K2smeIYCqyB8/fnwfPyKmu1snL062PvvyzsneycnJi72Tre+d/J7f/v7W9158+94n379zcnKHvptOt05K+ne6+/8AXtfdCDAAAAA=
D73B8CB4BF70AAE0F81B1B311D4C6F14	1	cxsmiles	JChemExcelNwAAAB+LCAAAAAAABADtvQdgHEmWJSYvbcp7f0r1StfgdKEIgGATJNiQQBDswYjN5pLsHWlHIymrKoHKZVZlXWYWQMztnbz33nvvvffee++997o7nU4n99//P1xmZAFs9s5K2smeIYCqyB8/fnwfPyKmu1snL062PvvyzsneycnJi72Tre+d/J7f/v7W9158+94n379zMr03xXPvDjWZTrdOSvp3uvv/AOYxts83AAAA
77378AAFE8CE054D47C11E0AFAF51C47	1	cxsmiles	JChemExcelPAAAAB+LCAAAAAAABADtvQdgHEmWJSYvbcp7f0r1StfgdKEIgGATJNiQQBDswYjN5pLsHWlHIymrKoHKZVZlXWYWQMztnbz33nvvvffee++997o7nU4n99//P1xmZAFs9s5K2smeIYCqyB8/fnwfPyKmu1snL062PvvyzsneycnJi72Tre+d/J7f/v7WizsnW9N7Uzz37kz3+Zf9O9RuOt06Kenf6e7/A3z4eCk8AAAA
98C2B22B2CAE865070BEA89052BB36D6	1	cxsmiles	JChemExcelNQAAAB+LCAAAAAAABADtvQdgHEmWJSYvbcp7f0r1StfgdKEIgGATJNiQQBDswYjN5pLsHWlHIymrKoHKZVZlXWYWQMztnbz33nvvvffee++997o7nU4n99//P1xmZAFs9s5K2smeIYCqyB8/fnwfPyK+9+Lb9z75/vdOfs9vf3/rZLo7xbN752Trsy/vvNg9oWdXftfvtk7KO9Pd/wfjt44KNQAAAA==
1E0B8B39FE06EB60E7EDA06071E6A6ED	1	cxsmiles	JChemExcelNgAAAB+LCAAAAAAABADtvQdgHEmWJSYvbcp7f0r1StfgdKEIgGATJNiQQBDswYjN5pLsHWlHIymrKoHKZVZlXWYWQMztnbz33nvvvffee++997o7nU4n99//P1xmZAFs9s5K2smeIYCqyB8/fnwfPyKmu1sv7iyn9M90a3u6N53e+96Lb3/y/a2Tk5MvT+5M96dbU3r272xP702ne9To5OTOcvf/ASSvewQ2AAAA
211FDF5232975D811DC3D151A3776518	1	cxsmiles	JChemExcelNAAAAB+LCAAAAAAABADtvQdgHEmWJSYvbcp7f0r1StfgdKEIgGATJNiQQBDswYjN5pLsHWlHIymrKoHKZVZlXWYWQMztnbz33nvvvffee++997o7nU4n99//P1xmZAFs9s5K2smeIYCqyB8/fnwfPyKmu1sv7iynWycnd6Zb29O96XR67+TkZGu6P8Wzf+cFfXXyJX17b7pHTajx7v8DDJV0yzQAAAA=
3D602A6035BCA045679040382AC36A7D	1	cxsmiles	JChemExcelLgAAAB+LCAAAAAAABADtvQdgHEmWJSYvbcp7f0r1StfgdKEIgGATJNiQQBDswYjN5pLsHWlHIymrKoHKZVZlXWYWQMztnbz33nvvvffee++997o7nU4n99//P1xmZAFs9s5K2smeIYCqyB8/fnwfPyKmu1sv7iyn9M90a3u6N53em26dnJy8uEf/fHlyZzrdu4MP7nxv+e1Pvr/7/wDYt5d1LgAAAA==
17FE73C0DA35B7E7EF7080B49D5DADD6	1	cxsmiles	JChemExcelQQAAAB+LCAAAAAAABADtvQdgHEmWJSYvbcp7f0r1StfgdKEIgGATJNiQQBDswYjN5pLsHWlHIymrKoHKZVZlXWYWQMztnbz33nvvvffee++997o7nU4n99//P1xmZAFs9s5K2smeIYCqyB8/fnwfPyKmu1sv7iyn9M90a3u6N51O7315sjXdn063nt2Rf/bvbJ3cOdn67Ms7L7ZOTk6+PLkzvTfdo/YnJ3eWu/8PnJI36kEAAAA=
FFF8F06162F6DF50E98AF80C49115A3E	1	cxsmiles	JChemExcelPgAAAB+LCAAAAAAABADtvQdgHEmWJSYvbcp7f0r1StfgdKEIgGATJNiQQBDswYjN5pLsHWlHIymrKoHKZVZlXWYWQMztnbz33nvvvffee++997o7nU4n99//P1xmZAFs9s5K2smeIYCqyB8/fnwfPyKmu1sv7iyn9M90a3u6N51O7315sjXdn063nt2Rf/bvnGx99uWdF1snJydfntyZ3pvuUeOTkzvL3f8HpxVZfT4AAAA=
5455B067F328603C864B245071FD5433	1	cxsmiles	JChemExcelPAAAAB+LCAAAAAAABADtvQdgHEmWJSYvbcp7f0r1StfgdKEIgGATJNiQQBDswYjN5pLsHWlHIymrKoHKZVZlXWYWQMztnbz33nvvvffee++997o7nU4n99//P1xmZAFs9s5K2smeIYCqyB8/fnwfPyKmu1sv7iyn9M90a3u6N51O7315snVyh/53svXZl3e+9+Lbn3x/6+TkBf91cmd6b7pHTU9O7ix3/x9CP8TZPAAAAA==
5721E8B306ABA36A51E1F8AA042A7436	1	cxsmiles	JChemExcelNQAAAB+LCAAAAAAABADtvQdgHEmWJSYvbcp7f0r1StfgdKEIgGATJNiQQBDswYjN5pLsHWlHIymrKoHKZVZlXWYWQMztnbz33nvvvffee++997o7nU4n99//P1xmZAFs9s5K2smeIYCqyB8/fnwfPyKmu1sv7iyn9M90a3u6N51O7335vZPf89vf3zq5c7L12Zd3XmydnJx8eXJnem+6R21OTu4sd/8fKN1LfDUAAAA=
057BF002D8877B96424B5C074A9FFA85	1	cxsmiles	JChemExcelGAAAAB+LCAAAAAAABADtvQdgHEmWJSYvbcp7f0r1StfgdKEIgGATJNiQQBDswYjN5pLsHWlHIymrKoHKZVZlXWYWQMztnbz33nvvvffee++997o7nU4n99//P1xmZAFs9s5K2smeIYCqyB8/fnwfPyK+PDnZPdn68o79//defHvvk+/v/j+NrumhGAAAAA==
77D1AB3E716F1A8D4C6B5D2317B755D4	1	cxsmiles	JChemExcelNwAAAB+LCAAAAAAABADtvQdgHEmWJSYvbcp7f0r1StfgdKEIgGATJNiQQBDswYjN5pLsHWlHIymrKoHKZVZlXWYWQMztnbz33nvvvffee++997o7nU4n99//P1xmZAFs9s5K2smeIYCqyB8/fnwfPyKmu1snL062PvvyzsneycnJi72Tre+d/J7f/v7W9158+94n379zcnLvBM+9O9RkOt06Kenf6e7/A410ix83AAAA
E702943091CD19538BC527117C57F9FA	1	cxsmiles	JChemExcelLwAAAB+LCAAAAAAABADtvQdgHEmWJSYvbcp7f0r1StfgdKEIgGATJNiQQBDswYjN5pLsHWlHIymrKoHKZVZlXWYWQMztnbz33nvvvffee++997o7nU4n99//P1xmZAFs9s5K2smeIYCqyB8/fnwfPyJOTr538nv+nt/+/tb3Xnz73iffv3Oy9dmXd17sntCzK7+fTHen9GydlHemu/8PskhBpy8AAAA=
17E44CA7ED508CA69823101C12E9EF8C	1	cxsmiles	JChemExcelLQAAAB+LCAAAAAAABADtvQdgHEmWJSYvbcp7f0r1StfgdKEIgGATJNiQQBDswYjN5pLsHWlHIymrKoHKZVZlXWYWQMztnbz33nvvvffee++997o7nU4n99//P1xmZAFs9s5K2smeIYCqyB8/fnwfPyJOTk62Xtw52frsyzsvdumP7538nt/+/q78fTLdm06nW9Pp3h00+uzF/wNbKSYpLQAAAA==
B38C0808437876BE29186794D16C0F2A	1	cxsmiles	JChemExcelMgAAAB+LCAAAAAAABADtvQdgHEmWJSYvbcp7f0r1StfgdKEIgGATJNiQQBDswYjN5pLsHWlHIymrKoHKZVZlXWYWQMztnbz33nvvvffee++997o7nU4n99//P1xmZAFs9s5K2smeIYCqyB8/fnwfPyJOTr538nv+nt/+/taLOydbn31558XuCX/07e/vyt8n073pdLo1ne5Rgxd3Pnvx/wC2i2FBMgAAAA==
00ECDE2CA65C74A7B582CD37BC650BDF	1	cxsmiles	JChemExcelMgAAAB+LCAAAAAAABADtvQdgHEmWJSYvbcp7f0r1StfgdKEIgGATJNiQQBDswYjN5pLsHWlHIymrKoHKZVZlXWYWQMztnbz33nvvvffee++997o7nU4n99//P1xmZAFs9s5K2smeIYCqyB8/fnwfPyJOTr538nv+nt/+/taLOydbn31558XuCX/07e/vyt8n093pdLo1ne5Sgxd3Pnvx/wAs5pPeMgAAAA==
7797F7CADD2C2C0D4311B027B8857AD7	1	cxsmiles	JChemExcelOQAAAB+LCAAAAAAABADtvQdgHEmWJSYvbcp7f0r1StfgdKEIgGATJNiQQBDswYjN5pLsHWlHIymrKoHKZVZlXWYWQMztnbz33nvvvffee++997o7nU4n99//P1xmZAFs9s5K2smeIYCqyB8/fnwfPyKmu1snL062PvvyzsneycnJi72Tre+d/J7f/v7W9158+94n379zcnKHvptOp1snWy/ufEaf7tGn0+nu/wMtKoCIOQAAAA==
788D1E332CB7A4F7601656F98728E006	1	cxsmiles	JChemExcelRQAAAB+LCAAAAAAABADtvQdgHEmWJSYvbcp7f0r1StfgdKEIgGATJNiQQBDswYjN5pLsHWlHIymrKoHKZVZlXWYWQMztnbz33nvvvffee++997o7nU4n99//P1xmZAFs9s5K2smeIYCqyB8/fnwfPyJenGxNd6fTrZOTrZOtF3snJ9978e29T75/crJ357Mv77x4vTW9N53uT7em03t3pvTs39miz+l/9Pvunc+k9f8DUidLAkUAAAA=
9CCEDBA4443AC33C2E21E4B0E2797063	1	cxsmiles	JChemExcelQwAAAB+LCAAAAAAABADtvQdgHEmWJSYvbcp7f0r1StfgdKEIgGATJNiQQBDswYjN5pLsHWlHIymrKoHKZVZlXWYWQMztnbz33nvvvffee++997o7nU4n99//P1xmZAFs9s5K2smeIYCqyB8/fnwfPyJenGx99r0X39775Pt3prtTerZOTrZevN767Ms7+P90jz66h8/p3707J/jsxf7JibxycrJ/Z7r7/wC40qbjQwAAAA==
0951A99874389788C6EFB402D1F3AA09	1	cxsmiles	JChemExcelQQAAAB+LCAAAAAAABADtvQdgHEmWJSYvbcp7f0r1StfgdKEIgGATJNiQQBDswYjN5pLsHWlHIymrKoHKZVZlXWYWQMztnbz33nvvvffee++997o7nU4n99//P1xmZAFs9s5K2smeIYCqyB8/fnwfPyJOTnZPTl5s0Y87J1uffUn/nEz3pvRsTffojxd3Pvvei2/vffL9Oy9e42v8f3qPvt5HG/r33v8DlO3XY0EAAAA=
FF2A9A80FC05C59B591E71C204FBE1D3	1	cxsmiles	JChemExcelQwAAAB+LCAAAAAAABADtvQdgHEmWJSYvbcp7f0r1StfgdKEIgGATJNiQQBDswYjN5pLsHWlHIymrKoHKZVZlXWYWQMztnbz33nvvvffee++997o7nU4n99//P1xmZAFs9s5K2smeIYCqyB8/fnwfPyJenGxNd6fTrZOTrZOtF3sn+Hnn5GTvzmdf3nnxemt6bzrdn25Np/fuTOnZv7NFn9P/6PfdO59978W39z75/v8DZ04ZE0MAAAA=
68B4D790C2816D01FFAAC7D734F5904D	1	cxsmiles	JChemExcelTQAAAB+LCAAAAAAABADtvQdgHEmWJSYvbcp7f0r1StfgdKEIgGATJNiQQBDswYjN5pLsHWlHIymrKoHKZVZlXWYWQMztnbz33nvvvffee++997o7nU4n99//P1xmZAFs9s5K2smeIYCqyB8/fnwfPyJOtj778s7WyWe7J3ufnWx978W3P/n+1snJ905+z9/z29/f+vKO9xu3/N6X29+/c7J7snVyh/7Ds3fnxcn03hTPvf8HQlxK6U0AAAA=
615169605B0C9D22B1FFE1DAB020DBD7	1	cxsmiles	JChemExcelUwAAAB+LCAAAAAAABADtvQdgHEmWJSYvbcp7f0r1StfgdKEIgGATJNiQQBDswYjN5pLsHWlHIymrKoHKZVZlXWYWQMztnbz33nvvvffee++997o7nU4n99//P1xmZAFs9s5K2smeIYCqyB8/fnwfPyKmu1t3Tz47ufu9k9/z9/z297e+vHPifjvZ+uzLO9/7cvv7d6Zb29O96XS69ezOdLp3ZznderF1cuc1vsf/T+58b/ntT74/3T2hT0/+H67lEyVTAAAA
407EE51C530D47725A6E45A4BBED6F5A	1	cxsmiles	JChemExcelTQAAAB+LCAAAAAAABADtvQdgHEmWJSYvbcp7f0r1StfgdKEIgGATJNiQQBDswYjN5pLsHWlHIymrKoHKZVZlXWYWQMztnbz33nvvvffee++997o7nU4n99//P1xmZAFs9s5K2smeIYCqyB8/fnwfPyJOTrZO7kx3l9Mt+t/2dG86nW49uzOd7tGHv+/JZye/7/dOfs/f89vf3/ryzon77WTre19uf//OZ1/eeUFvv6b/b9Hvn335/wDIvMhYTQAAAA==
E2EA518BA3E6CBAE671231EB783A6054	1	cxsmiles	JChemExcelUgAAAB+LCAAAAAAABADtvQdgHEmWJSYvbcp7f0r1StfgdKEIgGATJNiQQBDswYjN5pLsHWlHIymrKoHKZVZlXWYWQMztnbz33nvvvffee++997o7nU4n99//P1xmZAFs9s5K2smeIYCqyB8/fnwfPyJOTrZO7pzsfkY/tj778s6Lk+neFM/enZM9fIhn786L3ZOT7538nr/nt7+/9eUd77eTre99uf39O599mf7M9NG9Ufto99Of+X8AUrRFV1IAAAA=
D1D395B0CF905C9A2AD3BB0941CE6745	1	cxsmiles	JChemExcelVAAAAB+LCAAAAAAABADtvQdgHEmWJSYvbcp7f0r1StfgdKEIgGATJNiQQBDswYjN5pLsHWlHIymrKoHKZVZlXWYWQMztnbz33nvvvffee++997o7nU4n99//P1xmZAFs9s5K2smeIYCqyB8/fnwfPyJOtj778s7WyWe7J3ufnWyd0LN353svvv3J9+n37538nr/nt7+/9eUd7zdu/70vt79/52SX2t85ufOCvqTvTr68M703xXPv/wFVcQLnVAAAAA==
DE3BE672B45237CBB8D750EED261586E	1	cxsmiles	JChemExcelTAAAAB+LCAAAAAAABADtvQdgHEmWJSYvbcp7f0r1StfgdKEIgGATJNiQQBDswYjN5pLsHWlHIymrKoHKZVZlXWYWQMztnbz33nvvvffee++997o7nU4n99//P1xmZAFs9s5K2smeIYCqyB8/fnwfPyJOtj778s7WdHc53dqe7k2n061nd6bTvTvLrZOT7538nr/nt7+/9eUd7zdu/70vt79/Z7p7snVy5+TOi5PpvSmee/8PMU9QL0wAAAA=
23A3A99CC8DBE84252964431493E2B37	1	cxsmiles	JChemExcelTgAAAB+LCAAAAAAABADtvQdgHEmWJSYvbcp7f0r1StfgdKEIgGATJNiQQBDswYjN5pLsHWlHIymrKoHKZVZlXWYWQMztnbz33nvvvffee++997o7nU4n99//P1xmZAFs9s5K2smeIYCqyB8/fnwfPyJOtj778s7WdHe5dbJ1cufkznTr5OR7J7/n7/nt7299ecf7jdt978vt71OL5e6d7enedDrdenZnOt278+Jkem+K597/A+r0bU9OAAAA
19CA850E21DFD1A26D2C6C3B29FADF17	1	cxsmiles	JChemExcelSgAAAB+LCAAAAAAABADtvQdgHEmWJSYvbcp7f0r1StfgdKEIgGATJNiQQBDswYjN5pLsHWlHIymrKoHKZVZlXWYWQMztnbz33nvvvffee++997o7nU4n99//P1xmZAFs9s5K2smeIYCqyB8/fnwfPyJOtj778s7WdPd7y29/f7pF/+2e3Nme7k2n061nd6bTvTsnJ987+T1/z29/f+vLO95v/Nr3vtz+/p0X03tTPPf+H6QlA5JKAAAA
9051A8A6B302FA6D50BC6BDA018A0F48	1	cxsmiles	JChemExcelWQAAAB+LCAAAAAAABADtvQdgHEmWJSYvbcp7f0r1StfgdKEIgGATJNiQQBDswYjN5pLsHWlHIymrKoHKZVZlXWYWQMztnbz33nvvvffee++997o7nU4n99//P1xmZAFs9s5K2smeIYCqyB8/fnwfPyJOTrZO7pzsfkY/tj778s6L7538nt/+/tbJl3eme1M8e3dO9vAlPXt3XuyenFADtPjyjvfbydb3vtz+/p3Pvkx/Zvro3qh9tHvwM/8PGRsRJVkAAAA=
82DCC6EB4573F1B4B1D9FCE0D90FEA3F	1	cxsmiles	JChemExcelSgAAAB+LCAAAAAAABADtvQdgHEmWJSYvbcp7f0r1StfgdKEIgGATJNiQQBDswYjN5pLsHWlHIymrKoHKZVZlXWYWQMztnbz33nvvvffee++997o7nU4n99//P1xmZAFs9s5K2smeIYCqyB8/fnwfPyJOTrZO7ix3p1snJ987+T1/z29/f+vLO95vJ1vf+3L7+3c++/LOdGs53T3Zot9enEx3p3h272zzb1vP7kynu/8Puzba3EoAAAA=
E8B10ED1B1CAEF8A41160AB8CD510BE3	1	cxsmiles	JChemExcelSgAAAB+LCAAAAAAABADtvQdgHEmWJSYvbcp7f0r1StfgdKEIgGATJNiQQBDswYjN5pLsHWlHIymrKoHKZVZlXWYWQMztnbz33nvvvffee++997o7nU4n99//P1xmZAFs9s5K2smeIYCqyB8/fnwfPyJOTrZO7kx3p1vL6db2dG86nW49uzOd7t1Z7p6cfO/k9/w9v/39rS/veL+dbH3vy+3v3/mMft2if16c0Mt4dv8fKRg0X0oAAAA=
ACDD51423D76015B61FD20B11833A877	1	cxsmiles	JChemExcelSAAAAB+LCAAAAAAABADtvQdgHEmWJSYvbcp7f0r1StfgdKEIgGATJNiQQBDswYjN5pLsHWlHIymrKoHKZVZlXWYWQMztnbz33nvvvffee++997o7nU4n99//P1xmZAFs9s5K2smeIYCqyB8/fnwfPyJOprvTre8tv/396dbJyfdOfs/f89vf3/ryjvfbydb3vtz+/p3Pvrwz3d2mxtPp1rM70+nunZMt+uwFfzKd7v4/l+xadUgAAAA=
F31E5E3AB2F011ED979C7AA7D9AE44B6	1	cxsmiles	JChemExcelPgAAAB+LCAAAAAAABADtvQdgHEmWJSYvbcp7f0r1StfgdKEIgGATJNiQQBDswYjN5pLsHWlHIymrKoHKZVZlXWYWQMztnbz33nvvvffee++997o7nU4n99//P1xmZAFs9s5K2smeIYCqyB8/fnwfPyK+9+Lb9z75/snWCT3y+52TrRf0N31y50R/97/73pfb37/z2Zfyv/8HzEzM7z4AAAA=
BD5F378F368D1238729F873F90D75F66	1	cxsmiles	JChemExcelMwAAAB+LCAAAAAAABADtvQdgHEmWJSYvbcp7f0r1StfgdKEIgGATJNiQQBDswYjN5pLsHWlHIymrKoHKZVZlXWYWQMztnbz33nvvvffee++997o7nU4n99//P1xmZAFs9s5K2smeIYCqyB8/fnwfPyJO8Hzvxbc/+f7WyR36devLO1svt7735fb378i/n315p/P3/wNMnCFDMwAAAA==
3E13462FFA83954D82ED1A394358EE7C	1	cxsmiles	JChemExcelLgAAAB+LCAAAAAAABADtvQdgHEmWJSYvbcp7f0r1StfgdKEIgGATJNiQQBDswYjN5pLsHWlHIymrKoHKZVZlXWYWQMztnbz33nvvvffee++997o7nU4n99//P1xmZAFs9s5K2smeIYCqyB8/fnwfPyJebn325Z2t7325/X3992Trpf8nvv3yzsnJ9158+94n3/9/AJGmcF0uAAAA
5B9E58C659728F0D96E45EB20C05298B	1	cxsmiles	JChemExcelNAAAAB+LCAAAAAAABADtvQdgHEmWJSYvbcp7f0r1StfgdKEIgGATJNiQQBDswYjN5pLsHWlHIymrKoHKZVZlXWYWQMztnbz33nvvvffee++997o7nU4n99//P1xmZAFs9s5K2smeIYCqyB8/fnwfPyJebn325Z2t7325/X3998vp7nQ63Tr53snv+Xt++/tbJ/iev/jei2/f++T7d6bT3f8HrG8mIDQAAAA=
531F0B1D4E9014E0E1E1BD083E5B6221	1	cxsmiles	JChemExcelDgAAAB+LCAAAAAAABADtvQdgHEmWJSYvbcp7f0r1StfgdKEIgGATJNiQQBDswYjN5pLsHWlHIymrKoHKZVZlXWYWQMztnbz33nvvvffee++997o7nU4n99//P1xmZAFs9s5K2smeIYCqyB8/fnwfPyJenGx99uLOi90TPLv/D/FyV90OAAAA
ECFECF3727627503E271135BC2C43E92	1	cxsmiles	JChemExcelRAAAAB+LCAAAAAAABADtvQdgHEmWJSYvbcp7f0r1StfgdKEIgGATJNiQQBDswYjN5pLsHWlHIymrKoHKZVZlXWYWQMztnbz33nvvvffee++997o7nU4n99//P1xmZAFs9s5K2smeIYCqyB8/fnwfPyJenGxNd6fT6dYJ/Xay92LrBP/dO8Fz7873Xnx775Pvn5xsffblne99uf39O/Tz5GQPP6bT3Tufyff/Dwo4z8tEAAAA
C776B04C694A20AB57364C43311C9E0D	1	cxsmiles	JChemExcelQAAAAB+LCAAAAAAABADtvQdgHEmWJSYvbcp7f0r1StfgdKEIgGATJNiQQBDswYjN5pLsHWlHIymrKoHKZVZlXWYWQMztnbz33nvvvffee++997o7nU4n99//P1xmZAFs9s5K2smeIYCqyB8/fnwfPyJenGy9ODk5oR8nuy+26N+t77349t4n3z852frsyzvf+3L7+3dOTvZO8OzdoU/wyy5++Uza/T87AFkaQAAAAA==
58A188A6855C3F821672E6087DBA353D	1	cxsmiles	JChemExcelQQAAAB+LCAAAAAAABADtvQdgHEmWJSYvbcp7f0r1StfgdKEIgGATJNiQQBDswYjN5pLsHWlHIymrKoHKZVZlXWYWQMztnbz33nvvvffee++997o7nU4n99//P1xmZAFs9s5K2smeIYCqyB8/fnwfPyK+9+Lb9z75/snWCT3y+52TrRf093R3imdX//S//t6X29+/89mX8r//B2bkXudBAAAA
F48CA24911B1D22B4A86A2FE7A2DBBF8	1	cxsmiles	JChemExcelPgAAAB+LCAAAAAAABADtvQdgHEmWJSYvbcp7f0r1StfgdKEIgGATJNiQQBDswYjN5pLsHWlHIymrKoHKZVZlXWYWQMztnbz33nvvvffee++997o7nU4n99//P1xmZAFs9s5K2smeIYCqyB8/fnwfPyJOTk62Tu6cbL042frsS/r5vRffvvfJ9+/QxyfmV3xBXwcffe/L7e/f+ezL/wcfz4NFPgAAAA==

## Sheet: EnthalpyTendencyAllCharged
Target	Smiles	Source	Molecule	DG	DH	-TDS	Heavy Atoms Count	Category
Ab N1G9	C(NC(=O)Cc1cc([N+](=O)[O-])c(O)cc1)CCCCC(=O)[O-]	Binding	tmp	-40.32	-70.56	29.1	22	fragment
Aldose Reductase (ALR2)	c1c(CNC(=O)c2ccc(Cl)cc2OCC(=O)[O-])c(F)cc(Br)c1	Binding	3	-42.7	-62.23	19.53	24	druglike
Aldose Reductase (ALR2)	c1c(CNC(=O)c2ccc(Cl)cc2OCC(=O)[O-])cc([N+](=O)[O-])cc1	Binding	4	-42.2	-79.34	37.14	25	druglike
Aldose Reductase (ALR2)	c1c(-c2nnc(SCC(=O)[O-])o2)oc([N+](=O)[O-])c1	Binding	2	-31.3	-8.56	-22.74	18	fragment
Aldose Reductase (ALR2)	c1cc(-c2noc(CCCC(=O)[O-])n2)cc([N+](=O)[O-])c1	Binding	1	-35.4	-25.53	-9.87	20	fragment
Alpha-Thrombin	NC(=[NH2+])c1ccc(CNC(=O)C2CCN2C(=O)C([NH2+]CC([O-])=O)C2CCCCC2)cc1	Scorpio	[((1r)-2-{(2s)-2-[({4-[amino(imino)methyl]benzyl}amino)carbonyl]azetidinyl}-1-cyclohexyl-2-oxoethyl)amino]acetic acid	-47.9	-37	-10.9	31	druglike
Alpha-Thrombin	NC(=[NH2+])NCCCNC(=O)C1CCCCN1C(=O)C(CC1CCCCC1)[NH2+]CC([O-])=O	Scorpio	{[(1r)-2-((2s)-2-{[(3-{[amino(imino)methyl]amino}propyl)amino]carbonyl}piperidinyl)-1-(cyclohexylmethyl)-2-oxoethyl]amino}acetic acid	-47.8	-57.8	10	31	druglike
Beta-Glucosidase	OCC1C(O)C(O)C[NH2+]C1	Scorpio	5-hydroxymethyl-3,4-dihydroxypiperidine	-41.42	-28.49	-12.93	10	fragment
Enoyl-ACP Reductase (FabI)	c1(O)c(Oc2ccccc2O)cccc1	Binding	PD048890	-39	-84.9	46.08	15	fragment
Enoyl-ACP Reductase (FabI)	c1(O)c(Oc2ccc(CCC)cc2O)cccc1	Binding	PD205405	-46	-81.6	35.52	18	fragment
Enoyl-ACP Reductase (FabI)	c1(O)c(Oc2ccc(CC)cc2O)cccc1	Binding	PD202165	-48.2	-98.3	49.59	17	fragment
Enoyl-ACP Reductase (FabI)	c1(O)c(Oc2ccc(C)cc2O)cccc1	Binding	PD200828	-45.8	-81.2	35.64	16	fragment
Enoyl-ACP Reductase (FabI) Mutant (F203L)	c1(O)c(Oc2ccc(CCC)cc2O)cccc1	Binding	PD205405	-35.4	-66.1	30.87	18	fragment
Enoyl-ACP Reductase (FabI) Mutant (F203L)	c1(O)c(Oc2ccc(CC)cc2O)cccc1	Binding	PD202165	-35.2	-36.4	1.26	17	fragment
Enoyl-ACP Reductase (FabI) Mutant (F203L)	c1(O)c(Oc2ccc(C)cc2O)cccc1	Binding	PD200828	-34.3	-62.3	29.01	16	fragment
Farnesyl Diphosphate Synthase (FPPS)	C(C(P([O-])([O-])=O)(P(=O)([O-])[O-])O)[n+]1cccc(I)c1	Binding	Bisphosphonate 5	-36.2406	31.2894	-67.53	18	fragment
Farnesyl Diphosphate Synthase (FPPS)	C(C(P([O-])([O-])=O)(P(=O)([O-])[O-])O)n1cc[nH+]c1	Binding	Bisphosphonate 3	-37.829	-19.769	-18.06	16	fragment
Farnesyl Diphosphate Synthase (FPPS)	C(C(P([O-])([O-])=O)(P(=O)([O-])[O-])O)c1ccccc1	Binding	Bisphosphonate 4	-31.1828	-41.7728	10.59	17	fragment
Farnesyl Diphosphate Synthase (FPPS)	CCCCC[NH+](C)CCC(O)(P([O-])([O-])=O)P([O-])([O-])=O	Binding	Bisphosphonate 2	-35.0702	12.4798	-47.55	19	fragment
Farnesyl Diphosphate Synthase (FPPS)	[NH3+]CCC(O)(P([O-])([O-])=O)P([O-])([O-])=O	Binding	Bisphosphonate 6	-36.993	2.157	-39.15	13	fragment
Fatty Acid-Binding Protein, Brain	CCCCCCCCCCCC(=O)[O-]	Scorpio	Lauric acid	-36.9	-37.3	0.4	14	fragment
Heat Shock Protein 90 (Hsp90)	n1([C@H]2[C@H](O)[C@@H]3OP(=O)([O-])OC[C@H]3O2)cnc4c(ncnc41)N	Binding	cAMP	-21.3	-42.24	20.94	22	fragment
HIV-1 Nef	O(C(Nc1ccc(c(C(=O)[O-])c1)O)=O)c2ccc(C(C)(C)C)cc2	Binding	14	-32.8	-3.82	-28.98	24	druglike
HIV-1 Nef	c1(C(C)(C)C)ccc(OCC(=O)Nc2cccc(C([O-])=O)c2)cc1	Binding	DLC27	-34.2	-3	-31.2	24	druglike
HIV-1 Nef	o1c-2c(c(cc(C(=O)[O-])c2[nH+]c3c1cc(cc3)N(C)C)=O)[O-]	Binding	D12	-33.3	-2.1	-31.2	22	fragment
HIV-1 Nef	[O-]C(CCCc1ccc2ccc3ccccc3c2c1)=O	Binding	D11	-29.3	-6.26	-23.04	20	fragment
HMG-CoA Reductase	CC(C)c1nc(nc(-c2ccc(F)cc2)c1\C=C\[C@@H](O)C[C@@H](O)CC([O-])=O)N(C)S(C)(=O)=O	Binding	rosuvastatin	-45.144	-55.074	9.93	33	druglike
HMG-CoA Reductase	CC(C)C1=C(C(=O)NCc2ccccc2)C2=C(CCCCC2)N1CC[C@@H](O)C[C@@H](O)CC([O-])=O	Binding	11	-41.8	-28.96	-12.84	34	druglike
HMG-CoA Reductase	CC(C)C1=C(C(=O)N[C@H](CO)c2ccccc2)C2=C(CCCC2)N1CC[C@@H](O)C[C@@H](O)CC([O-])=O	Binding	10	-43.054	-31.894	-11.16	35	druglike
HMG-CoA Reductase	CC(C)c1c(nc(-c2ccc(F)cc2)n1CC[C@@H](O)C[C@@H](O)CC([O-])=O)C(=O)NCc1ccccc1	Binding	1	-45.562	-73.282	27.72	36	druglike
HMG-CoA Reductase	CC(C)n1c(CC[C@@H](O)C[C@@H](O)CC([O-])=O)c(nc1C(=O)NCc1ccccc1)-c1ccc(F)cc1	Binding	8	-43.472	-68.282	24.81	36	druglike
HMG-CoA Reductase	Cc1c([nH]c(CC[C@@H](O)C[C@@H](O)CC([O-])=O)c1-c1ccc(F)cc1)C(=O)Nc1ccccc1	Binding	16	-47.652	-56.352	8.7	33	druglike
Nucleoside Diphosphate Kinase	OC1C(COP(OP(=O)([O-])[O-])(=O)[O-])OC(n2c(=O)[nH]c(=O)cc2)C1O	Scorpio	Uridine-5'-diphosphate	-18.33	-7.11	-11.3	25	druglike
Nucleoside Diphosphate Kinase	Cc1c(=O)[nH]c(=O)n(C2OC(COP(OP(=O)([O-])[O-])(=O)[O-])C(O)C2)c1	Scorpio	Thymidine-5'-diphosphate	-19.58	-13.39	-6.28	25	druglike
Oligo-Peptide Binding Protein	[NH3+]CCCCC([NH3+])C(=O)NC(Cc1ccccc1)C(=O)NC(CCCC[NH3+])C([O-])=O	Scorpio	KFK	-41.5	22	-63.2	30	druglike
Oligo-Peptide Binding Protein	CCC(C)C(NC(=O)C([NH3+])CCCC[NH3+])C(=O)NC(CCCC[NH3+])C([O-])=O	Scorpio	KIK	-38.3	20.5	-58.6	27	druglike
panthotenate synthetase	OC(=O)c1cc2ccccc2o1	Silvestre et al PNAS 110 12984 2013	14	-16.736	-36.4008	19.6648	12	fragment
panthotenate synthetase	OC(=O)c1onc2ccccc12	Silvestre et al PNAS 110 12984 2013	16	-10.8784	-47.2792	36.4008	12	fragment
panthotenate synthetase	OC(=O)C1COc2c(O1)cccc2	Silvestre et al PNAS 110 12984 2013	6 R	-17.1544	-33.0536	15.8992	13	fragment
panthotenate synthetase	CSc1cc(cs1)C(O)=O	Silvestre et al PNAS 110 12984 2013	1	-15.4808	-30.1248	14.644	10	fragment
panthotenate synthetase	OC(=O)c1cc2nsnc2cc1	Silvestre et al PNAS 110 12984 2013	7	-13.8072	-39.3296	25.5224	12	fragment
panthotenate synthetase	OC(=O)CCc1ccc2OCOc2c1	Silvestre et al PNAS 110 12984 2013	1	-16.736	-58.1576	41.4216	14	fragment
panthotenate synthetase	OC(=O)C1=Cc2ccccc2OC1	Silvestre et al PNAS 110 12984 2013	15	-9.6232	-51.4632	41.84	13	fragment
panthotenate synthetase	Cn1nc(C)c2c1sc(c2)C(O)=O	Silvestre et al PNAS 110 12984 2013	8	-17.5728	-31.4218	13.849	13	fragment
panthotenate synthetase	OC(=O)c1ccc2OCOc2c1	Silvestre et al PNAS 110 12984 2013	3	-12.9704	-48.5344	35.564	12	fragment
panthotenate synthetase	COc1cc2c(cc1)c(CC(O)=O)co2	Silvestre et al PNAS 110 12984 2013	2	-18.828	-42.2584	23.4304	15	fragment
panthotenate synthetase	OC(=O)CSCc1ccccc1	Silvestre et al PNAS 110 12984 2013	13	-12.9704	-44.7688	31.7984	12	fragment
panthotenate synthetase	OC(=O)CCc1cccs1	Silvestre et al PNAS 110 12984 2013	12	-11.2968	-88.7008	77.404	10	fragment
PIM-1 Kinase	c12n(C)cc(c1cccc2)C=3C(=O)NC(C3c4c5c(n(CCC[NH3+])c4)cccc5)=O	Binding		-43.054	-41.314	-1.74	30	druglike
PIM-1 Kinase	C=1(C(=O)NC(C1c2c3c([nH]c2)cccc3)=O)c4c5c(n(CCC[NH+](C)C)c4)cccc5	Binding		-43.472	-60.512	17.04	31	druglike
PIM-1 Kinase	C1(=O)C(c2c3c(n4CCC(CN)Cc42)cccc3)=C(c5c[nH]c6c5cccc6)C(=O)N1	Binding	BIM-10	-38.456	-22.556	-15.9	31	druglike
PIM-1 Kinase	C1(=O)C(c2c3c(cccc3)n(CCCSC(=[NH2+])N)c2)=C(c4cn(C)c5c4cccc5)C(=O)N1	Binding	BIM-9	-43.89	-44.88	0.99	33	druglike
PIM-1 Kinase	C1(=O)C(c2c3c(n4CCC(C[NH+](C)C)Cc42)cccc3)=C(c5c[nH]c6c5cccc6)C(=O)N1	Binding	BIM-11	-35.53	-12.1	-23.43	33	druglike
PIM-1 Kinase	C1c2c-3c4[NH+](c5c3cccc5)[C@]6(O[C@@H]([NH+]7c4c(-c8c7cccc8)c2C(=O)N1)C[C@H]([C@H]6OC)NC)C	Binding	Staurosporine	-48.07	-33.28	-14.79	35	druglike
PIM-1 Kinase	Oc1cc(ccc1[O-])-c1oc2cc([O-])cc(O)c2c(=O)c1[O-]	Binding	quercetin	-40.964	-39.824	-1.14	22	fragment
Ribonuclease A	OCC1C(OP(=O)(O)[O-])C(O)C(n2c(=O)[nH]c(=O)cc2)O1	Scorpio	3'-uridinemonophosphate	-25.1	-49.37	24.27	21	fragment
Ribonuclease A (K7A/R10A/K66A)	OCC1C(OP(=O)(O)[O-])C(O)C(n2c(=O)[nH]c(=O)cc2)O1	Scorpio	3'-uridinemonophosphate	-22.18	-39.33	17.15	21	fragment
Streptavidin (synthetic construct)	Oc1ccc(N=Nc2c(C(=O)[O-])cccc2)cc1	Scorpio	HABA	-22.05	7.11	-29.16	18	fragment
Streptavidin (synthetic construct)	Cc1c(O)ccc(N=Nc2c(C(=O)[O-])cccc2)c1	Scorpio	3'-methyl-HABA	-30.25	5.36	-35.61	19	fragment
Streptavidin (synthetic construct)	Cc1c(O)c(C)cc(N=Nc2c(C(=O)[O-])cccc2)c1	Scorpio	3',5'-dimethyl-HABA	-34.69	9	-43.68	20	fragment
Thrombin	CCCC(=O)N1CCC[C@H]1C(=O)NCc2ccc(cc2)C(N)=N	Baum JMB 2010 397 1042	3c	-32.8	-27	-5.8	23	druglike
Thrombin	CC[C@@H](N)C(=O)N1CCC[C@H]1C(=O)NCc1ccc(cc1)C(N)=N	Baum JMB 2009 391 552 4 Baum JMB 2010 397 1042 4c		-40.1	-38.7	-1.4	24	druglike
Thrombin	CC(C)CCC(=O)N1CCC[C@H]1C(=O)NCc2ccc(cc2)C(N)=N	Baum JMB 2010 397 1042	3e	-37.4	-22.7	-14.7	25	druglike
Thrombin	CC(C)CC(N)C(=O)N1CCC[C@H]1C(=O)NCc2ccc(cc2)C(N)=N	Baum JMB 2010 397 1042	4e	-42.9	-34.5	-8.4	26	druglike
Thrombin	NC(=N)c1ccc(CNC(=O)[C@@H]2CCCN2C(=O)CCc3ccccc3)cc1	Baum JMB 2010 397 1042	3l	-37.8	-28.6	-9.2	28	druglike
Thrombin	c1(CNC(=O)C2CCCN2C([C@H]([NH3+])Cc3ccccc3)=O)ccc(C(N)=[NH2+])cc1	Binding	5	-44	-44.81	0.81	29	druglike
Thrombin	N[C@H](Cc1ccccc1)C(=O)N2CCCC2C(=O)NCc3ccc(cc3)C(N)=N	Baum JMB 2009 390 56 4 Baum JMB 2009 391 552 5 Baum JMB 2010 397 1042 4l		-46.1	-40.1	-6	29	druglike
Thrombin	NCc1ccc(Cl)c(CNC(=O)[C@@H]2CCCN2C(=O)CNS(=O)(=O)Cc3ccccc3)c1	Biela JMC 2012 55 6094	1 buffer corrected	-47.8	-35.4	-12.4	32	druglike
Thrombin	NC(=N)c1ccc(CNC(=O)[C@@H]2CCCN2C(=O)CNS(=O)(=O)Cc3ccccc3)cc1	Biela JMC 2012 55 6094	6 buffer corrected	-44.9	-14.3	-30.6	32	druglike
Thrombin	C[C@@H](NS(=O)(=O)Cc1ccccc1)C(=O)N1CCC[C@H]1C(=O)NCc1cc(Cl)ccc1CN	Biela JMB 2012 418 350	12	-47.3	-40.2	-7.1	33	druglike
Thrombin	C[C@@H](NS(=O)(=O)Cc1ccccc1)C(=O)N2CCC[C@H]2C(=O)NCc3cc(CN)ccc3Cl	Biela JMC 2012 55 6094	2 buffer corrected	-47.2	-32.1	-15.1	33	druglike
Thrombin	C[C@@H](NS(=O)(=O)Cc1ccccc1)C(=O)N2CCC[C@H]2C(=O)NCc3ccc(cc3)C(N)=N	Biela JMC 2012 55 6094	7 buffer corrected	-42.6	-15.9	-26.7	33	druglike
Thrombin	N[C@H](C(c1ccccc1)c2ccccc2)C(=O)N3CCC[C@H]3C(=O)NCc4ccc(cc4)C(N)=N	Baum JMB 2009 391 552	6	-48.5	-47.5	-1	35	druglike
Thrombin	c1(CNC(=O)C2CCCN2C([C@H](N)C(c3ccccc3)c4ccccc4)=O)ccc(C(N)=[NH2+])cc1	Binding	6	-46.4	-40.67	-5.73	35	druglike
Thrombin	CC(C)[C@@H](NS(=O)(=O)Cc1ccccc1)C(=O)N2CCC[C@H]2C(=O)NCc3ccc(cc3)C(N)=N	Biela JMC 2012 55 6094	8 buffer corrected	-47.1	-13.8	-33.3	35	druglike
Thrombin	NC(=N)c1ccc(CNC(=O)[C@@H]2CCCN2C(=O)[C@H](Cc3ccccc3)NCCc4ccccc4)cc1	Biela JMC 2012 55 6094	11	-37.9	-17.1	-20.8	37	druglike
Thrombin	NC(=N)N1CCCCC1	Rühman Biochim Biophys 2015		-22.9	-15.4	-7.4	9	fragment
Thrombin	NC(=N)c1ccccc1	Rühman Biochim Biophys 2015		-19.8	-13.9	-5.9	9	fragment
Transcriptional Regulator TtgR	c1(O)c2c(oc(-c3cc(O)c([O-])cc3)c([O-])c2=O)cc([O-])c1	Binding	quercetin	-30.9738	-19.9638	-11.01	22	fragment
Transcriptional Regulator TtgR	c1c([O-])cc(O)c2c1occ(-c3ccc([O-])cc3)c2=O	Binding	Gen	-26.4594	-8.2494	-18.21	20	fragment
Transcriptional Regulator TtgR	c1(O)c2c(oc(-c3cc(O)c([O-])cc3)cc2=O)cc([O-])c1	Binding	luteolin	-29.8034	-12.9134	-16.89	21	fragment
Transcriptional Regulator TtgR	c1(O)c2c(oc(-c3ccc([O-])cc3)cc2=O)cc([O-])c1	Binding	apigenin	-27.8806	-5.5906	-22.29	20	fragment
Transcriptional Regulator TtgR-DNA	c1(O)c2c(oc(-c3cc(O)c([O-])cc3)c([O-])c2=O)cc([O-])c1	Binding	quercetin	-33.231	-21.561	-11.67	22	fragment
Trypsin	NC(=N)c1ccc(CNC(=O)C2CCCN2C(=O)CNC3CCCC3)cc1	Scorpio	Brandt JMB 2011 405 1170 1a	-37.3	-22.4	-14.9	27	druglike
Trypsin	NC(=N)c1ccc(CNC(=O)C2CCCN2C(=O)CNC3CCCCC3)cc1	Scorpio	Brandt JMB 2011 405 1170 1b	-37.8	-19.9	-17.9	28	druglike
Trypsin	NC(=N)c1ccc(CNC(=O)C2CCCN2C(=O)CNC3CCCCCC3)cc1	Scorpio	Brandt JMB 2011 405 1170 1c	-37.4	-18.9	-18.5	29	druglike
Trypsin	NC(=N)c1ccc(CNC(=O)C2CCCN2C(=O)CNC3CCCCCCC3)cc1	Scorpio	Brandt JMB 2011 405 1170 1d	-37.5	-15.3	-22.2	30	druglike
Trypsin	NC(=[NH2+])c1cccc(CC(NS(=O)(=O)c2ccc3ccccc3c2)C(=O)N2CC[NH2+]CC2)c1	Dullweber JMC 2001 313 593	1d N-alpha-(2-naphthylsulfonyl)-3-amidino-l-phenylalanine piperazide	-40.8	-32.9	-7.9	33	druglike
Trypsin	CC1CCN(CC1)C(=O)C(Cc1cccc(c1)C(N)=[NH2+])NS(=O)(=O)c1ccc2ccccc2c1	Dullweber JMC 2001 313 593	1a N-alpha-(2-naphthylsulfonyl)-n-(3-amidino-l-phenylalaninyl)-d-pipecolinic acid-variant-1a	-42.5	-27.1	-15.4	34	druglike
Trypsin	NC(c1ccccc1)=[NH2+]	Scorpio	Benzamidine	-26.6	-18.9	-7.7	9	fragment
Trypsin	NC(c1ccc(N)cc1)=[NH2+]	Scorpio	Benzamidine-para-amide	-29.1	-30.2	1.4	10	fragment
Trypsin	NC(c1ccc(OC)cc1)=[NH2+]	Scorpio	Benzamidine-para-methoxyl	-25.3	-15.7	-9.6	11	fragment
Trypsin	NC(c1ccc(CON)cc1)=[NH2+]	Scorpio	Benzamidine-para-amino	-23.7	-14.9	-8.8	12	fragment
Trypsin	NC(=[NH2+])c1ccc(cc1)C(N)=O	BindingDB	Talhout, R.; Engberts, J. B. F. N. Eur. J. Biochem. 2001, 268, 1554-1560	-23.9	-12.3	-11.6	12	fragment
Trypsin	c1(C(C)C)ccc(C(N)=[NH2+])cc1	Binding		-22.7	-12	-10.65	12	fragment
Trypsin	c1(CCCC)ccc(C(N)=[NH2+])cc1	Binding		-26.2	-9.9	-16.41	13	fragment
Trypsin	c1(CCCCC)ccc(C(N)=[NH2+])cc1	Binding		-26.8	-6.6	-20.79	14	fragment
Trypsin	c1(CCCCCC)ccc(C(N)=[NH2+])cc1	Binding		-28.9	-6.6	-22.74	15	fragment
v-Src SH2 Domain	c1c(Br)c(Cl)c2c([nH]cc2OP([O-])(=O)[O-])c1	Binding	6	-22.7	-18.98	-3.72	16	fragment
v-Src SH2 Domain	c1c(=O)oc2c(ccc(OP([O-])(=O)[O-])c2)c1C(F)(F)F	Binding	1	-21.4	-5.41	-15.99	20	fragment
v-Src SH2 Domain	[NH3+][C@@H](Cc1ccc(OP([O-])([O-])=O)cc1)C([O-])=O	Binding	Phosphotyrosine	-21.4	-3.19	-18.21	17	fragment
