# Supplementary material for: On the enthalpic preference of fragment binding
Source: Royal Society of Chemistry journal article supplement (doi:10.1039/c5md00542f), 2015-12-10
Supplement: c5md00542f2.xlsx [file c5md00542f2.xlsx]

## Sheet: __JChemStructureSheet
Hash	StructureStringLength	StructureStringFormat	StructureString
64A4B4966334B0BBE7C283E45A0E2F97	1	cxsmiles	JChemExcelEwAAAB+LCAAAAAAABADtvQdgHEmWJSYvbcp7f0r1StfgdKEIgGATJNiQQBDswYjN5pLsHWlHIymrKoHKZVZlXWYWQMztnbz33nvvvffee++997o7nU4n99//P1xmZAFs9s5K2smeIYCqyB8/fnwfPyK+PNn67Ms7093pdG+KZ6/a/X8AwK+vjxMAAAA=
4FD2BCA0450E3ED79252EFDCBA891EF9	1	cxsmiles	JChemExcelEwAAAB+LCAAAAAAABADtvQdgHEmWJSYvbcp7f0r1StfgdKEIgGATJNiQQBDswYjN5pLsHWlHIymrKoHKZVZlXWYWQMztnbz33nvvvffee++997o7nU4n99//P1xmZAFs9s5K2smeIYCqyB8/fnwfPyK+PNn67Ms7093p3hTP3rLa/X8AkKhHqhMAAAA=
8DDA8827B4B5EE1C25871E9529C81BD1	1	cxsmiles	JChemExcelDwAAAB+LCAAAAAAABADtvQdgHEmWJSYvbcp7f0r1StfgdKEIgGATJNiQQBDswYjN5pLsHWlHIymrKoHKZVZlXWYWQMztnbz33nvvvffee++997o7nU4n99//P1xmZAFs9s5K2smeIYCqyB8/fnwfPyK+PNn67Ms7JyfT3el02uz+P9ZxUjwPAAAA
3E180D8A611902CEF4C59CE532F18181	1	cxsmiles	JChemExcelNAAAAB+LCAAAAAAABADtvQdgHEmWJSYvbcp7f0r1StfgdKEIgGATJNiQQBDswYjN5pLsHWlHIymrKoHKZVZlXWYWQMztnbz33nvvvffee++997o7nU4n99//P1xmZAFs9s5K2smeIYCqyB8/fnwfPyJefO/k9/z297dOTnZP8OzeOdn67Ms7L/bod/5mT/4+md6bTrdOyjvT6fTe/wP5XhDMNAAAAA==
417395A27E1F2F61EA5A5F450DFD38C0	1	cxsmiles	JChemExcelMgAAAB+LCAAAAAAABADtvQdgHEmWJSYvbcp7f0r1StfgdKEIgGATJNiQQBDswYjN5pLsHWlHIymrKoHKZVZlXWYWQMztnbz33nvvvffee++997o7nU4n99//P1xmZAFs9s5K2smeIYCqyB8/fnwfPyJOTrZO7px87+T3/D2//f2tF3dOtj778s6L3ZMTfPTt7+/K3yfTvel066S8M51O9/4fxM2flTIAAAA=
A6552DFF4224DD93337E0E1F9E5FE9AD	1	cxsmiles	JChemExcelLgAAAB+LCAAAAAAABADtvQdgHEmWJSYvbcp7f0r1StfgdKEIgGATJNiQQBDswYjN5pLsHWlHIymrKoHKZVZlXWYWQMztnbz33nvvvffee++997o7nU4n99//P1xmZAFs9s5K2smeIYCqyB8/fnwfPyJOTr538nv+nt/+/taLOydbn31558XuCX/07e/vyt8n073pdOukvDOdTvf+H4wgCpcuAAAA
5A2677470F595124DFEE4BFE5486C463	1	cxsmiles	JChemExcelQwAAAB+LCAAAAAAABADtvQdgHEmWJSYvbcp7f0r1StfgdKEIgGATJNiQQBDswYjN5pLsHWlHIymrKoHKZVZlXWYWQMztnbz33nvvvffee++997o7nU4n99//P1xmZAFs9s5K2smeIYCqyB8/fnwfPyJOvnfye/6e3/7+1ovXW599eQf/P5nuTvHs3jnBny/2Tk7Q6Nvf35O/T6b3plsnL+5Qk62T8s703v8DzRyH7EMAAAA=
18D40449898521ADF59D8CF73F8FA5F1	1	cxsmiles	JChemExcelNwAAAB+LCAAAAAAABADtvQdgHEmWJSYvbcp7f0r1StfgdKEIgGATJNiQQBDswYjN5pLsHWlHIymrKoHKZVZlXWYWQMztnbz33nvvvffee++997o7nU4n99//P1xmZAFs9s5K2smeIYCqyB8/fnwfPyJOvrf85Pu7062TFydbn31552Tv5OTkxR7//r2T3/P3/Pb3t17cOZnem+K5d2dKDUv6d/f/AQi+j0M3AAAA
FA1F7B3FA76B24D644E2B3B8D3951D7E	1	cxsmiles	JChemExcelLAAAAB+LCAAAAAAABADtvQdgHEmWJSYvbcp7f0r1StfgdKEIgGATJNiQQBDswYjN5pLsHWlHIymrKoHKZVZlXWYWQMztnbz33nvvvffee++997o7nU4n99//P1xmZAFs9s5K2smeIYCqyB8/fnwfPyJefO/k9/z297dOprtTPLt3TrY++/LOi70Tevbk95PpPf7u3v8DTp/+6CwAAAA=
5C6E821B43CF0C93C8DC6EE6A69A095B	1	cxsmiles	JChemExcelNQAAAB+LCAAAAAAABADtvQdgHEmWJSYvbcp7f0r1StfgdKEIgGATJNiQQBDswYjN5pLsHWlHIymrKoHKZVZlXWYWQMztnbz33nvvvffee++997o7nU4n99//P1xmZAFs9s5K2smeIYCqyB8/fnwfPyK+9+Lb9z75/vdOfs9vf3/r5GT3BM/unZOtz76884L/2pXfT6a7U3q2Tso7093/B5aWNoE1AAAA
54DD578FD275A1036795E99946EA0FD8	1	cxsmiles	JChemExcelNAAAAB+LCAAAAAAABADtvQdgHEmWJSYvbcp7f0r1StfgdKEIgGATJNiQQBDswYjN5pLsHWlHIymrKoHKZVZlXWYWQMztnbz33nvvvffee++997o7nU4n99//P1xmZAFs9s5K2smeIYCqyB8/fnwfPyJefO/k9/z297dOTnZP8OzeOdn67Ms7L/AXf7Mrf59Md6f0bJ2Ud6a7/w9DeLypNAAAAA==
B234531A270F8F8143776C689168DCBA	1	cxsmiles	JChemExcelKwAAAB+LCAAAAAAABADtvQdgHEmWJSYvbcp7f0r1StfgdKEIgGATJNiQQBDswYjN5pLsHWlHIymrKoHKZVZlXWYWQMztnbz33nvvvffee++997o7nU4n99//P1xmZAFs9s5K2smeIYCqyB8/fnwfPyKmu9O95dZ0a3t6b0rP1snWyZ3PvrwzvXdnuty7s5xuvTg52af/3Znu/j+epv9/KwAAAA==
A3201B014E496C291D88A96B25702FB3	1	cxsmiles	JChemExcelNgAAAB+LCAAAAAAABADtvQdgHEmWJSYvbcp7f0r1StfgdKEIgGATJNiQQBDswYjN5pLsHWlHIymrKoHKZVZlXWYWQMztnbz33nvvvffee++997o7nU4n99//P1xmZAFs9s5K2smeIYCqyB8/fnwfPyJOPtvdOtn67Ms7L062Tnane9N7063vLb/9/enenSk99+7QV9P96X39dJ8/vf//AK9BY7w2AAAA

## Sheet: EnthalpyTendencyAllNoCharge
Target	Smiles	Source	Molecule	DG	DH	-TDS	Heavy Atoms Count	ASAHydrophobic_Con	ASAPolar_Con	Category
Aldose Reductase (ALR2)	c1c2c([C@@]3(NC(=O)[N-]C3=O)C[C@@H](C(=O)N)O2)cc(F)c1	Steuber JMB 2008 379 991	Fidarestat	-46.7	-75.68	28.98	20	89.5209	103.85	fragment
Aldose Reductase (ALR2)	c1c2c(OCC[C@@]23C(=O)[N-]C(=O)N3)ccc1F	Steuber JMB 2008 379 991	sorbinil	-37.9	-51.88	13.98	17	116.394	60.9192	fragment
Aldose Reductase (ALR2) Mutant (L300P)	c1c2c([C@@]3(NC(=O)[N-]C3=O)C[C@@H](C(=O)N)O2)cc(F)c1	Steuber JMB 2008 379 991	Fidarestat	-38.9	-68.81	29.91	20	89.5209	103.85	fragment
Aldose Reductase (ALR2) Mutant (L300P)	c1c2c(OCC[C@@]23C(=O)[N-]C(=O)N3)ccc1F	Steuber JMB 2008 379 991	sorbinil	-38.7	-46.74	8.04	17	116.394	60.9192	fragment
Beta-Glucosidase	OCC1C(O)C(O)CNO1	Gloster JBC 2004 279 49236	4 Tetrahydrooxazine	-36.11	-46.65	10.54	10	70.7373	71.3504	fragment
Beta-Glucosidase	OCC1[NH2+]CC(O)C(O)C1O	Gloster JBC 2004 279 49237	1 deoxynojirimycin	-26.53	-36.36	9.83	11	64.311	70.4322	fragment
Caspase-3	C1[C@@H](COC)N(S(=O)(=O)c2ccc3N4C(=NCC(C)(C)C4)C(=O)c3c2)CC1	Aulabaugh Biochemistry 2007 46 9462	WAY-207890	-45.98	-11.51	-34.47	27	259.233	49.6945	druglike
Caspase-3	O=S(=O)(c1ccc2c(c1)C(C(N2)=O)=O)N3CCC[C@H]3COc4cccnc4	Aulabaugh Biochemistry 2007 46 9462	IST-1	-43.054	-50.404	7.35	27	209.876	84.7746	druglike
Caspase-3	c1c2c(N(C)C(=O)C2=O)ccc1S(=O)(=O)N3CCC[C@H]3COc4ccccc4	Aulabaugh Biochemistry 2007 46 9462	IST-2	-42.218	-45.338	3.12	28	267.805	65.2408	druglike
Caspase-3	C1[C@@H](COc2ccccc2)N(S(=O)(=O)c3ccc4N5C(=NCC(C)(C)C5)C(=O)c4c3)CC1	Aulabaugh Biochemistry 2007 46 9462	WAY-208698	-42.218	-2.888	-39.33	32	319.862	47.0084	druglike
Caspase-3|IST-1 Complex	C1[C@@H](COC)N(S(=O)(=O)c2ccc3N4C(=NCC(C)(C)C4)C(=O)c3c2)CC1	Aulabaugh Biochemistry 2007 46 9462	WAY-207890	-37.411	-19.411	-18	27	259.233	49.6945	druglike
Heat Shock Protein (Full length)	CC1OC(=O)c2c(CC(=O)C=CC=CC3C(C1)O3)c(c(cc2O)[O-])Cl	Roe JMC 1999 42 260	Radicol	-44.1	-33.7	-10.4	25	182.729	61.8875	druglike
Heat Shock Protein 90 N-terminal Domain, (E. coli expressed)	CC1OC(=O)c2c(CC(=O)C=CC=CC3C(C1)O3)c(c(cc2O)[O-])Cl	Roe JMC 1999 42 260	Radicol	-48.9	-22.8	-26.1	25	182.729	61.8875	druglike
HIV-1 Nef	o1c(cc2c1c(cc3ccccc32)OC)[N+](=O)[O-]	Binding	15	-28	-1.63	-26.37	18	140.243	101.11	fragment
human carbonic anhydrase II	NS(=O)(=O)C1=CC=C(C=C1)C(=O)NCCCCCC(F)(F)F	Mecinovic JACS 2011 133 14017		-51.4632	-43.5136	-7.9496	22	175.19	143.388	fragment
human carbonic anhydrase II	NS(=O)(=O)C1=NC2=C(S1)C=CC=C2	Snyder PNAS 2011 108 17889	BTA	-50.208	-66.944	16.736	13	135.77	72.7648	fragment
human carbonic anhydrase II	NS(=O)(=O)C1=CC=C(C=C1)C(=O)NCCCCC(F)(F)F	Mecinovic JACS 2011 133 14017		-50.208	-43.932	-6.276	21	157.73	137.244	fragment
human carbonic anhydrase II	NS(=O)(=O)C1=CC2=CC=CC=C2O1	Snyder PNAS 2011 108 17889	BF	-49.3712	-64.852	15.4808	13	140.295	61.4022	fragment
human carbonic anhydrase II	NS(=O)(=O)C1=CC=C(C=C1)C(=O)NCCCC(F)(F)F	Mecinovic JACS 2011 133 14017		-49.3712	-43.0952	-6.276	20	139.276	144.821	fragment
human carbonic anhydrase II	NS(=O)(=O)c1cc2ccccc2s1	Snyder PNAS 2011 108 17889		-48.116	-52.3	4.184	13	157.566	49.1322	fragment
human carbonic anhydrase II	NS(=O)(=O)C1=NN=C(NS(=O)(=O)C2=CC=CC=C2)S1	Krishnamurthy Chem Rev 2008 108 946	139	-47.6976	-62.76	15.0624	19	141.177	139.052	fragment
human carbonic anhydrase II	CC(=O)NC1=NN=C(S1)S(N)(=O)=O	Krishnamurthy Chem Rev 2008 108 946	137	-46.8608	-48.9528	2.092	13	93.0001	127.055	fragment
human carbonic anhydrase II	CCCCCCNC(=O)C1=CC=C(C=C1)S(N)(=O)=O	Mecinovic JACS 2011 133 14017		-46.8608	-41.0032	-5.8576	19	223.066	89.9432	fragment
human carbonic anhydrase II	NS(=O)(=O)c1ccc(cc1F)C(=O)NCc1ccccc1	Scott MedChemMed 2009 4 1985	18	-46.8608	-56.9024	10.0416	21	177.888	103.796	fragment
human carbonic anhydrase II	NS(=O)(=O)C1=CC=C(C=C1)C(=O)NCCC(F)(F)F	Mecinovic JACS 2011 133 14017		-46.4424	-41.84	-4.6024	19	119.723	137.682	fragment
human carbonic anhydrase II	NS(=O)(=O)C(F)(F)F	Krishnamurthy Chem Rev 2008 108 946	188	-45.6056	-50.208	4.6024	8	13.4851	139.156	fragment
human carbonic anhydrase II	CCCCCNC(=O)C1=CC=C(C=C1)S(N)(=O)=O	Mecinovic JACS 2011 133 14017		-45.1872	-40.1664	-5.0208	18	200.766	89.6558	fragment
human carbonic anhydrase II	NS(=O)(=O)C1=CC(Cl)=C(Cl)C(=C1)S(N)(=O)=O	Krishnamurthy Chem Rev 2008 108 946	136	-44.7688	-25.9408	-18.828	16	98.743	135.444	fragment
human carbonic anhydrase II	NS(=O)(=O)C1=CC=C(C=C1)C(=O)NCC(F)(F)F	Mecinovic JACS 2011 133 14017		-44.3504	-40.5848	-3.7656	18	107.551	141.647	fragment
human carbonic anhydrase II	NS(=O)(=O)c1cc2CCCCc2s1	Snyder PNAS 2011 108 17889		-43.932	-48.5344	4.6024	13	133.811	77.6042	fragment
human carbonic anhydrase II	NS(=O)(=O)c1ccc(C(=O)NCc2ccccc2)c(F)c1	Scott MedChemMed 2009 4 1985	19	-43.932	-44.7688	0.8368	21	199.138	84.3101	fragment
human carbonic anhydrase II	CC(=O)NC1=[N](C)N=C(S1)S(N)(=O)=O	Krishnamurthy Chem Rev 2008 108 946	138	-43.5136	-43.5136	0	14	208.711	0	fragment
human carbonic anhydrase II	CCCCNC(=O)C1=CC=C(C=C1)S(N)(=O)=O	Mecinovic JACS 2011 133 14017		-43.5136	-39.3296	-4.184	17	188.071	91.1247	fragment
human carbonic anhydrase II	NS(=O)(=O)c1ccc(cc1)C(=O)NCc1ccccc1	Scott MedChemMed 2009 4 1985	17	-43.0952	-40.5848	-2.5104	20	192.206	88.6998	fragment
human carbonic anhydrase II	CCCNC(=O)C1=CC=C(C=C1)S(N)(=O)=O	Mecinovic JACS 2011 133 14017		-42.6768	-39.3296	-3.3472	16	161.89	91.3912	fragment
human carbonic anhydrase II	NS(=O)(=O)C1=NC=CS1	Snyder PNAS 2011 108 17889	TA	-41.1287	-51.3377	10.209	9	105.602	69.7624	fragment
human carbonic anhydrase II	CCNC(=O)C1=CC=C(C=C1)S(N)(=O)=O	Mecinovic JACS 2011 133 14017		-40.1664	-38.4928	-1.6736	15	142.246	101.888	fragment
human carbonic anhydrase II	NS(=O)(=O)c1cccc(F)c1	Scott MedChemMed 2009 4 1985	3	-39.3296	-31.38	-7.9496	11	112.029	66.6096	fragment
human carbonic anhydrase II	NS(=O)(=O)C1=CC=CO1	Snyder PNAS 2011 108 17889	F	-38.9112	-56.9024	17.9912	9	110.348	58.4753	fragment
human carbonic anhydrase II	NS(=O)(=O)c1ccc(cc1)C#N	Scott MedChemMed 2009 4 1985	17	-38.9112	-28.8696	-10.0416	12	96.7754	84.6007	fragment
human carbonic anhydrase II	NS(=O)(=O)c1ccccc1F	Scott MedChemMed 2009 4 1985	2	-37.2376	-39.3296	2.092	11	116.059	61.3546	fragment
human carbonic anhydrase II	NS(=O)(=O)c1cccs1	Snyder PNAS 2011 108 17889		-36.861	-38.953	2.092	9	114.555	59.3883	fragment
human carbonic anhydrase II	NS(=O)(=O)c1cccc(c1)C#N	Scott MedChemMed 2009 4 1985	16	-36.4008	-23.4304	-12.9704	12	105.348	75.7036	fragment
human carbonic anhydrase II	NS(=O)(=O)C1=NC2=C(N1)C=CC=C2	Snyder PNAS 2011 108 17889	BI	-36.1498	-36.4008	0.25104	13	122.172	74.0636	fragment
human carbonic anhydrase II	NS(=O)(=O)C1=CC=CC=C1	Binford BiochimBiophysActa 1974 341 345	benzenesulfonamide	-36.1	-45.7	9.6	10	119.438	55.684	fragment
human carbonic anhydrase II	COc1ccc(cc1)S(N)(=O)=O	Scott MedChemMed 2009 4 1985	15	-35.9824	-35.1456	-0.8368	12	135.12	73.9484	fragment
human carbonic anhydrase II	NS(=O)(=O)c1ccc(F)cc1	Scott MedChemMed 2009 4 1985	4	-35.1456	-29.288	-5.8576	11	118.103	60.6243	fragment
human carbonic anhydrase II	NS(=O)(=O)c1ccccc1	Scott MedChemMed 2009 4 1985	1	-34.7272	-31.38	-3.3472	10	119.438	55.684	fragment
human carbonic anhydrase II	COc1cccc(c1)S(N)(=O)=O	Scott MedChemMed 2009 4 1985	14	-33.0536	-19.2464	-13.8072	12	129.614	79.0969	fragment
human carbonic anhydrase II	NS(=O)(=O)C1=NC=CN1	Snyder PNAS 2011 108 17889	I	-28.8696	-15.4808	-13.3888	9	97.6021	65.0346	fragment
Major Urinary Protein	COc1c(CC(C)C)nccn1	Bingham JACS 2004 126 1675	2-isobutyl-3-methoxypyrazine	-38.5	-47.89	9.39	12	194.96	18.5066	fragment
Major Urinary Protein (MUP-1)	OCCCCCCCC	Malham JACS 2005 127 17061	Nonan-1-ol	-35.6	-58.01	22.41	9	190.97	23.3614	fragment
Major Urinary Protein (MUP-1)	COc1c(C(C)C)nccn1	Malham JACS 2005 127 17061	Octan-1-ol	-33.9	-44.28	10.38	11	179.226	17.5092	fragment
Major Urinary Protein (MUP-1)	OCCCCCCC	Malham JACS 2005 127 17061	Heptan-1-ol	-32.5	-53.41	20.91	8	179.352	23.3202	fragment
Major Urinary Protein (MUP-1)	OCCCCCC	Malham JACS 2005 127 17061	hexan-1-ol	-28.3	-47.59	19.29	7	155.685	23.3031	fragment
Major Urinary Protein (MUP-1)	OCCCCC	Malham JACS 2005 127 17061	Pentan-1-ol	-23.1	-41.01	17.91	6	144.58	23.2648	fragment
Major Urinary Protein (MUP-1)	OCCCCCCCCO	Barratt JMB 2006 362 994	1,8-Octanediol	-17.2	-34.3	17.1	10	175.307	46.6987	fragment
Major Urinary Protein I	CC(CC=1SCCN1)C	Sharrow Biochemistry 2003 42 6302	2-(iso-butyl)-1,4-dihydrothiazole	-37.03	-51.84	14.81	9	171.697	12.1817	fragment
Major Urinary Protein I	CCC(C=1SCCN1)C	Sharrow Biochemistry 2003 42 6302	2-(sec-butyl)-4,5-dihydrothiazole	-34.43	-53.97	19.54	9	175.968	10.2695	fragment
Major Urinary Protein I	CCCC=1SCCN1	Sharrow Biochemistry 2003 42 6302	2-(n-propyl)-1,4-dihydrothiazole	-33.05	-47.28	14.23	8	169.14	14.5697	fragment
Major Urinary Protein I	CCC=1SCCN1	Sharrow Biochemistry 2003 42 6302	2-(ethyl)-1,4-dihydrothiazole	-27.91	-43.93	16.02	7	151.588	15.2202	fragment
Major Urinary Protein I	CC=1SCCN1	Sharrow Biochemistry 2003 42 6302	2-(methyl)-1,4-dihydrothiazole	-22.64	-46.02	23.38	6	125.739	19.1902	fragment
Major Urinary Protein MUP-1 Y120F	COc1nccnc1CC(C)C	Barratt JACS 2005 127 11827	IBMP	-35.31	-31.44	-3.87		194.96	18.5066	fragment
MMP-12	COc1ccc(cc1)S(=O)(=O)N(C[C@@H](O)CO)[C@H](CO)C(=O)NO	Bertini JACS 2007 129 2466	compound 14	-46.5261	-33.8067	-12.7194	24	174.982	114.278	druglike
MMP-12	CNC(=O)[C@H](Cc1c[nH]c2ccccc12)NC(=O)[C@H](CC(C)C)CC(=O)NO	Bertini JACS 2007 129 2466	galardin	-46.2332	-17.0289	-29.2043	28	263.45	58.1472	druglike
MMP-12	CCCCC[C@H](CC(=O)NO)C(=O)N[C@@H](C(C)C)C(=O)N1CCC[C@@H]1CO	Bertini JACS 2007 129 2466	actinonin	-39.8735	9.2048	-49.0783	27	285.797	59.2921	druglike
MMP-12	CCCCCCc1ccc(cc1)S(=O)(=O)NCC(=O)N[O-]	Bertini JACS 2007 129 2466	compound 4	-49.2038	-37.0284	-12.1754	21	244.63	83.0476	fragment
MMP-12	COc1ccc(cc1)S(=O)(=O)N(CC(C)C)CC(=O)NO	Bertini JACS 2007 129 2466	compound 12	-47.7813	-34.4762	-13.3051	21	215.553	75.3461	fragment
MMP-12	COc1ccc(cc1)S(=O)(=O)N[C@H](CO)C(=O)NO	Bertini JACS 2007 129 2466	compound 8	-46.9445	-35.1038	-11.8407	19	128.833	103.346	fragment
MMP-12	COc1ccc(cc1)S(=O)(=O)N(CCO)CC(=O)NO	Bertini JACS 2007 129 2466	compound 6	-46.2332	-40.3756	-5.8576	20	173.002	101.619	fragment
MMP-12	COc1ccc(cc1)S(=O)(=O)N(C[C@@H](O)CO)CC(=O)NO	Bertini JACS 2007 129 2466	compound 13	-46.2332	-37.1958	-9.0374	22	170.633	110.183	fragment
MMP-12	COc1ccc(cc1)S(=O)(=O)N[C@H](CCO)C(=O)NO	Bertini JACS 2007 129 2466	compound 9	-45.4382	-33.9741	-11.4641	20	147.928	113.48	fragment
MMP-12	COc1ccc(cc1)S(=O)(=O)NCC(=O)NO	Bertini JACS 2007 129 2466	compound 3	-43.932	-35.6477	-8.2843	17	152.451	101.877	fragment
MMP-12	OCCN(CC(=O)NO)S(=O)(=O)c1ccc(F)cc1	Bertini JACS 2007 129 2466	compound 5	-42.2166	-27.0286	-15.188	19	130.963	108.968	fragment
MMP-12	ONC(=O)CNS(=O)(=O)c1ccccc1	Bertini JACS 2007 129 2466	compound 1	-41.1287	-38.0326	-3.0961	15	119.699	98.3827	fragment
MMP-12	ONC(=O)CNS(=O)(=O)c1ccc(F)cc1	Bertini JACS 2007 129 2466	compound 2	-41.0032	-28.3257	-12.6775	16	111.701	110.131	fragment
p38	CC(O)[C@H](O)COc1cc(ccc1)C(=O)c2c(N)n(nc2)-c3ccc(F)cc3	Papalia Anal Biochem 383 255 2009	2	-42.2584	31.38	-73.6384	28	240.226	90.232	druglike
p38	Cn1c2cccnc2c(c1-c3ccncc3)-c4ccc(F)cc4	Papalia Anal Biochem 383 255 2014	7	-39.3296	-48.5344	9.2048	23	230.537	33.8308	druglike
p38	Nc1c(cnn1-c2ccc(F)cc2)C(=O)c3cccc(OC[C@@H](O)CO)c3	Papalia Anal Biochem 383 255 2008	1	-37.2376	-12.9704	-24.2672	27	229.274	92.6805	druglike
p38	Nc1c(cnn1-c2ccc(F)cc2)C(=O)c3ccc(cc3)C#CCN4CCOCC4	Papalia Anal Biochem 383 255 2012	5	-34.3088	-10.0416	-24.2672	30	281.806	70.1699	druglike
p38	Nc1c(cnn1-c2ccccc2)C(=O)c3ccc(cc3)C#CCN4CCOCC4	Papalia Anal Biochem 383 255 2013	6	-33.8904	-2.5104	-31.38	29	306.282	43.0644	druglike
p38	[nH]1c2cccnc2c(c1-c3ccncc3)-c4ccccc4	Papalia Anal Biochem 383 255 2016	9	-44.3504	-36.8192	-7.5312	21	211.655	35.1558	fragment
p38	Fc1ccc(cc1)-c2c([nH]c3cccnc23)-c4ccncc4	Papalia Anal Biochem 383 255 2017	10	-41.0032	-26.7776	-14.2256	22	211.428	39.0414	fragment
p38	Cn1c2cccnc2c(c1-c3ccncc3)-c4ccccc4	Papalia Anal Biochem 383 255 2015	8	-38.9112	-44.3504	5.4392	22	246.698	14.0001	fragment
p38	Nc1c(cnn1-c2ccc(F)cc2)C(=O)c3ccccc3	Papalia Anal Biochem 383 255 2011	4	-34.7272	-17.9912	-16.736	21	214.584	34.8329	fragment
p38	Nc1c(cnn1-c2ccccc2)C(=O)c3ccccc3	Papalia Anal Biochem 383 255 2010	3	-31.38	-27.196	-4.184	20	213.678	32.4571	fragment
panthotenate synthetase	Nc1ncnc2c1ncn2[C@@H]3O[C@H](SSCc4ccc(cc4)[N+]([O-])=O)[C@@H](O)[C@H]3O	ScottChemBioChem 10 2772 2009	14b	-23.3609	-18.828	-4.53289	29	183.805	145.39	druglike
panthotenate synthetase	Nc1ncnc2c1ncn2[C@@H]3O[C@H](SSCc4ccccc4)[C@@H](O)[C@H]3O	ScottChemBioChem 10 2772 2009	14a	-20.971	-59.8312	38.8602	26	207.524	95.7958	druglike
panthotenate synthetase	Nc1ncnc2c1ncn2[C@@H]3O[C@H](SSCC(O)CO)[C@@H](O)[C@H]3O	ScottChemBioChem 10 2772 2009	14c	-18.4982	-49.3712	30.873	24	127.294	116.491	druglike
panthotenate synthetase	Nc1ncnc2c1ncn2[C@@H]3O[C@H](CS)[C@@H](O)[C@H]3O	ScottChemBioChem 10 2772 2009	6	-19.5023	-93.7216	74.2193	19	105.864	91.9838	fragment
panthotenate synthetase	CN(C)S(=O)(=O)c1cscc1	Silvestre et al PNAS 110 12984 2013	11	-14.2256	-67.7808	53.5552	11	149.317	42.6284	fragment
panthotenate synthetase	NC(=S)c1ccccc1	Silvestre et al PNAS 110 12984 2013	17	-12.9704	-22.1752	9.2048	9	114.007	38.2274	fragment
PIM-1 Kinase	CC(=O)c1cccc(c1)-c1cnc2ccc(NCC3CC3)nn12	Binding	imidazol[1,2-b]pyridazine 1	-40.964	-20.294	-20.67	23	258.117	33.6967	druglike
PIM-1 Kinase	O=C1NC(=O)C(=C1c1c[nH]c2ccccc12)c1c[nH]c2ccccc12	Binding		-40.964	-43.394	2.43	25	187.762	57.8184	druglike
Polyandrocarpa Lectin	CC(NC1C(O)C(O)C(CO)OC1O)=O	Poget JMB 1999 290 867	N-acetyl-d-glucosamine	-15.5	-15.1	-0.4	15	104.865	85.4903	fragment
Quinone Reductase 2 (QR2)	C(=C/c1cc(O)cc([O-])c1)\c2ccc(O)cc2	Calamini BiochemJ 2008 413 81	resveratrol	-40.964	-62.024	21.06	17	149.643	78.7181	fragment
Quinone Reductase 2 (QR2)	c1c2c([nH]c(I)c2CCNC(C)=O)ccc1OC	Calamini BiochemJ 2008 413 81	2-Iodomelatonin	-35.53	-32.8	-2.73	18	230.752	41.2648	fragment
Quinone Reductase 2 (QR2)	c1c(CCNC(C)=O)c2c([nH]1)ccc(c2)OC	Calamini BiochemJ 2008 413 81	Melatonin	-33.7326	-43.7526	10.02	17	220.88	41.0725	fragment
Renin	CCc1nc(N)nc(N)c1-c1ccc2CCC(N(CCCOC)c2c1)c1ccccc1	Sarver Anal Biochem 2007 360 34	4	-40.8386	-41.7986	0.96	31	305.748	73.9403	druglike
Renin	CCc1nc(N)nc(N)c1-c1ccc2OC(C)(C)C(=O)[NH+](CCNC(C)=O)c2c1	Sarver Anal Biochem 2007 360 33	6	-40.2952	-44.7052	4.41	29	219.318	103.135	druglike
Renin	CCc1nc(N)nc(N)c1-c1ccc-2c(c1)[NH+](CCCOC)c1ccccc-21	Sarver Anal Biochem 2007 360 32	3	-39.6682	-54.2782	14.61	28	255.491	70.9312	druglike
Renin	CCc1nc(N)nc(N)c1-c1ccc2O[C@H](C)C(=O)N(CCCOC)c2c1	Sarver Anal Biochem 2007 360 31	7	-38.8322	-55.5422	16.71	27	274.419	83.6608	druglike
Renin	CCc1nc(N)nc(N)c1-c1ccc2OC(C)(C(=O)N(CCCOC)c2c1)c1cc(F)cc(F)c1	Sarver Anal Biochem 2007 360 36	2	-38.7486	-37.2186	-1.53	35	283.09	120.466	druglike
Renin	CCc1nc(N)nc(N)c1-c1ccc2OC(C(=O)N(CCCOC)c2c1)c1cc(F)cc(F)c1	Sarver Anal Biochem 2007 360 35	5	-36.6586	-28.4686	-8.19	34	287.836	114.295	druglike
Renin	CCc1[nH+]c(N)nc(N)c1-c1ccc2CCCN(CCCOC)c2c1	Sarver Anal Biochem 2007 360 30	8	-36.0734	-60.5234	24.45	25	269.826	65.6283	druglike
Thrombin	N[C@H](C(c1ccccc1)c2ccccc2)C(=O)N3CCC[C@H]3C(=O)NCc4cc(Cl)ccc4	Baum JMB 2009 391 552	3	-39.6	-45.6	6	33	291.906	18.0973	druglike
Thrombin	N[C@H](CC1CCCCC1)C(=O)N1CCC[C@H]1C(=O)NCc1cccc(Cl)c1	Baum JMB 2009 391 552	7	-38.9	-35.6	-3.3	27	296.388	20.5714	druglike
Thrombin	N[C@H](Cc1ccccc1)C(=O)N2CCC[C@H]2C(=O)NCc3cc(Cl)ccc3Cl	Baum JMB 2009 390 56 6a (DG=-38.4;DH=-41.3?) Biela JMB 2012 418 350 13 (DG=-37.6;DH=-34.5?) Biela JMC 2012 55 6094 12 (DG=-37.6;DH=-37.5?)		-37.6	-37.5	-0.1	28	291.88	17.7765	druglike
Thrombin	Cc1ccc(Cl)cc1CNC(=O)C2CCCN2C(=O)[C@H](N)Cc3ccccc3	Baum JMB 2009 390 56	6b	-37.2	-33.5	-3.7	28	306.059	17.7644	druglike
Thrombin	[NH3+][C@H](Cc1ccccc1)C(=O)N1CCCC1C(=O)NCc1cccc(Cl)c1	Baum JMB 2009 391 552	2	-35.4	-37.11	1.71	27	292.219	26.3835	druglike
Thrombin	CC(C)C[C@@H](N)C(=O)N1CCC[C@H]1C(=O)NCc1cccc(Cl)c1	Baum JMB 2010 397 1042	2e	-35.1	-42.7	7.6	24	279.078	18.2722	druglike
Thrombin	CCc1cccc(CNC(=O)C2CCCN2C(=O)[C@H](N)Cc3ccccc3)c1	Baum JMB 2009 390 56	3b	-32.9	-16.5	-16.4	28	304.018	17.2855	druglike
Thrombin	CC(=O)N[C@H](CC1CCCCC1)C(=O)N2CCC[C@H]2C(=O)NCc3cc(Cl)ccc3	Baum JMB 2009 391 552	8	-32.6	-29	-3.6	30	305.191	27.0372	druglike
Thrombin	N[C@H](Cc1ccccc1)C(=O)N1CCCC1C(=O)NCc1ccccc1	Baum JMB 2009 390 56 5 Biela JMB 2012 418 350 1		-31.7	-13.6	-18.1	26	286.34	18.7071	druglike
Thrombin	N[C@@H](Cc1ccccc1)C(=O)N2CCCC2C(=O)NCc3nccc(Cl)c3	Biela JMB 2012 418 350	8	-31.5	-30.3	-1.2	27	296.553	25.8896	druglike
Thrombin	N[C@H](Cc1ccccc1)C(=O)N2CCCC2C(=O)NCc3cc(F)ccc3	Baum JMB 2009 390 56 1a Baum JMB 2009 391 552 1		-31.3	-13.1	-18.2	27	272.138	30.0414	druglike
Thrombin	N[C@@H](Cc1ccccc1)C(=O)N2CCCC2C(=O)NCc3cnccc3	Biela JMB 2012 418 350	2	-25.8	-17.7	-8.1	26	276.695	27.9695	druglike
Thrombin	C[n+]1ccc(Cl)c(CNC(=O)C2CCCN2C(=O)[C@@H](N)Cc3ccccc3)c1	Biela JMB 2012 418 350	11	-24.3	-22.4	-1.9	28	316.318	23.3814	druglike
Thrombin	C[n+]1ccc(CNC(=O)C2CCCN2C(=O)[C@@H](N)Cc3ccccc3)cc1	Biela JMB 2012 418 350	7	-24	-23.6	-0.4	27	313.102	19.3679	druglike
Thrombin	C[n+]1cccc(CNC(=O)C2CCCN2C(=O)[C@@H](N)Cc3ccccc3)c1	Biela JMB 2012 418 350	3	-23.9	-18.7	-5.2	27	313.313	19.3823	druglike
Thrombin	C[n+]1ccc(Cl)cc1CNC(=O)C1CCCN1C(=O)[C@@H](N)Cc1ccccc1	Biela JMB 2012 418 350	9	-23.7	-23.3	-0.4	28	309.392	23.6578	druglike
Thrombin	C[n+]1c(CNC(=O)C2CCCN2C(=O)[C@@H](N)Cc3ccccc3)cccc1	Biela JMB 2012 418 350	5	-21.4	-15.5	-5.9	27	305.516	18.6422	druglike
Thrombin	CC[C@@H](N)C(=O)N1CCC[C@H]1C(=O)NCc1cccc(Cl)c1	Baum JMB 2010 397 1042	2c	-31.3	-33.5	2.2	22	253.508	19.3103	fragment
Thrombin	NC(=O)c1ccc(Cl)s1	Rühman Biochim Biophys 2015		-19	-29.7	10.7	9	106.633	54.9122	fragment
Thrombin	COc1ccc(cc1)C(=O)Nc2ccccn2	Rühman Biochim Biophys 2015		-17.1	-15.7	-1.5	17	185.824	52.9159	fragment
Thymidine Kinase	[C@H]1(n2cc(C)c(=O)[nH]c2=O)C[C@@H]([C@@H](CO)O1)O	Perozzo JMB 2000 275 16139	thymidine	-30.1	-78.9	49.8	17	122.705	81.7763	fragment
Transcriptional Regulator TtgR	c1c(O)c(C(=O)CCc2ccc(O)cc2)c(O)cc1[O-]	Binding	Phloretin	-28.7584	-8.5384	-20.22	20	161.851	87.2747	fragment
Transcriptional Regulator TtgR	ClC(C(N[C@H](CO)[C@@H](c1ccc(cc1)[N+](=O)[O-])O)=O)Cl	Binding	Chloramphenicol	-27.797	-55.727	27.93	20	148.24	100.655	fragment
Transcriptional Regulator TtgR	c1c2c(c3c(c4c(cc(O)cc4)o3)c(=O)o2)ccc1[O-]	Binding	Coumestrol	-27.4626	-7.2426	-20.22	20	129.401	92.5037	fragment
Transcriptional Regulator TtgR	O(C(c1ccc(cc1)O)=O)CCCC	Binding	Butyl paraben	-27.2536	-18.8536	-8.4	14	200.935	45.7216	fragment
Transcriptional Regulator TtgR	c1(O)cc(O)cc2ccccc21	Binding	1,3-Dihydroxynaphthalene	-24.453	-80.283	55.83	12	111.483	55.8454	fragment
Transcriptional Regulator TtgR	c1(O)ccc(C2CC(=O)c3c(O)cc(O)cc3O2)cc1	Binding	Naringenin	-24.2858	-14.5358	-9.75	20	139.49	92.7809	fragment
Transcriptional Regulator TtgR	c1(O)cccc2ccccc21	Binding	1-Naphthol	-22.1958	-45.3558	23.16	11	142.561	20.0836	fragment
Transcriptional Regulator TtgR Mutant R176G	c1c(O)c(C(=O)CCc2ccc(O)cc2)c(O)cc1[O-]	Binding	Phloretin	-29.26	-89.65	60.39	20	161.851	87.2747	fragment
Transcriptional Regulator TtgR Mutant R176G	c1(O)ccc(C2CC(=O)c3c(O)cc(O)cc3O2)cc1	Binding	Naringenin	-26.334	-103.284	76.95	20	139.49	92.7809	fragment
Transcriptional Regulator TtgR-DNA	c1c(O)c(C(=O)CCc2ccc(O)cc2)c(O)cc1[O-]	Binding	Phloretin	-36.575	-79.805	43.23	20	161.851	87.2747	fragment
Transcriptional Regulator TtgR-DNA	c1(O)ccc(C2CC(=O)c3c(O)cc(O)cc3O2)cc1	Binding	Naringenin	-29.1346	-59.0446	29.91	20	139.49	92.7809	fragment
Transcriptional Regulator TtgR-DNA	ClC(C(N[C@H](CO)[C@@H](c1ccc(cc1)[N+](=O)[O-])O)=O)Cl	Binding	Chloramphenicol	-26.6684	-47.0084	20.34	20	148.24	100.655	fragment
